1  
2  
3  
4  
5  
6  
7  
8  
9  
10  
11  
12  
13  
14  
15  
16  
17  
18  
19  
20  
21  
22  
23  
24  
25  
26  
27  
28  
29  
30  
31  
32  
33

***m6A methylation potentiates cytosolic dsDNA recognition in a  
sequence-specific manner***

***running title: m6a methylation modulates immunogenicity of dsDNA***

**Melania Balzarolo<sup>1</sup>, Sander Engels<sup>1</sup>, Anja J. de Jong<sup>1</sup>, Katka Franke<sup>2</sup>, Timo K. van den  
Berg<sup>2</sup>, Edith M. Janssen<sup>3</sup>, Bas van Steensel<sup>4</sup> and Monika C. Wolkers<sup>1,5</sup>**

<sup>1</sup>Sanquin Research, Department of Hematopoiesis, and Landsteiner Laboratory, Academic Medical Centre (AMC), University of Amsterdam, Amsterdam, The Netherlands

<sup>2</sup>Sanquin Research, Department of Blood cell research, and Landsteiner Laboratory, Academic Medical Centre (AMC), University of Amsterdam, Amsterdam, The Netherlands

<sup>3</sup>Division of Molecular Immunology, Cincinnati Children's Hospital Research Foundation, University of Cincinnati College of Medicine, Room S5.419, 3333 Burnet Avenue, Cincinnati, OH 45229.

<sup>4</sup>Division of Gene Regulation, Netherlands Cancer Institute, 1066 CX Amsterdam, Netherlands

<sup>5</sup>To whom correspondence may be addressed

**Correspondence to:** Monika Wolkers, Sanquin Research Department of Hematopoiesis, and Landsteiner Laboratory, AMC. Plesmanlaan 125, 1066 CX Amsterdam, The Netherlands.  
email: [m.wolkers@sanquin.nl](mailto:m.wolkers@sanquin.nl). Tel: +31-20-5127003. FAX: +31-20-5123474.

34 **Abstract**

35

36 Nucleic acid sensing through pattern recognition receptors is critical for immune recognition  
37 of microbial infections. Microbial DNA is frequently methylated at the N<sup>6</sup> position of  
38 adenines (m6A), a modification that is rare in mammalian host DNA. We show that m6A-  
39 methylation of 5'-GATC-3' motifs augments the immunogenicity of double stranded  
40 (ds)DNA in macrophages and dendritic cells. Transfection with m6A-methylated DNA  
41 increased the expression of the activation markers CD69 and CD86, and of *Ifnβ*, *iNos* and  
42 *Cxcl10* mRNA. Recognition of m6A DNA occurs independently of TLR and RIG-I signaling  
43 but requires STING, a key mediator of cytosolic DNA sensing. Intriguingly, the response to  
44 m6A DNA is sequence-specific. m6A is immunostimulatory in some motifs, but  
45 immunosuppressive in others, a feature that is conserved between mouse and human. In  
46 conclusion, epigenetic alterations of bacterial DNA are differentially perceived by innate  
47 cells, a feature that could potentially be used for the design of immune-modulating  
48 therapeutics.

49

50

51

## 52 **Introduction**

53

54 Innate immune cells can recognize invading pathogens through pattern recognition receptors  
55 (PRRs) (1). This feature allows for rapid recognition of invading pathogens and for a swift  
56 onset of immune responses. De-regulation of PRR sensing signaling is associated with  
57 pathogenic and autoimmune conditions (2, 3).

58

59 A wide range of PRRs localize in the endosomes and in the cytosol where they detect  
60 bacterial and viral nucleic acids (3–5). In the endosome, Toll-like receptors (TLRs) sense  
61 single-stranded (ss) and double-stranded (ds)RNA (TLR3), as well as conserved pathogen-  
62 derived ssDNA structures (TLR7/9) (6). Engaging these TLRs leads to the induction of pro-  
63 inflammatory cytokines like Interleukin (IL)-6, Tumor necrosis factor (TNF)- $\alpha$ , and type I  
64 Interferons (IFNs) in an NF- $\kappa$ B- and MYD88/TRIF-dependent manner (6–9). In the cytosol,  
65 viral dsRNA is recognized by the RIG-I-like family of receptors (RLRs) and MDA5 (5).  
66 Through the adaptor protein IPS1/MAVS, proinflammatory cytokines and type I IFNs are  
67 produced (5, 10). dsDNA present in the cytosol is primarily recognized by cGAS and AIM2,  
68 which promote the production of type I IFNs and IL-1 $\beta$  through STING and ASC,  
69 respectively (11, 12). Other DNA sensors include RNA polymerase III, IFI16 and DAI (4, 5).

70

71 Recognition of pathogenic cytosolic DNA is influenced by sequence length, secondary  
72 structures and nucleotide overhangs (3, 5). For instance, the right-handed (B) form of DNA is  
73 well recognized by cytosolic DNA sensors (13, 14). Furthermore, guanosine overhangs in  
74 conserved Y-form DNA of retroviruses such as the human immunodeficiency virus type 1  
75 (HIV-1) potentiate type I IFN production in human macrophages (15).

76

77 Eukaryotic and microbial DNA also differ in their epigenetic landscape, in particular  
78 methylation of adenines and cytosines. These modifications are catalyzed by DNA  
79 methyltransferases (MTases). Adenine and cytosine methylations are found in DNA of most  
80 prokaryotes (16) and are involved in bacterial defense, virulence, chromosomal replication,  
81 and gene regulation (16, 17). The best studied prokaryotic MTase is DNA adenine  
82 methyltransferase (Dam). Dam was originally described in *Escherichia coli* and methylates  
83 adenine in position N<sup>6</sup> (m6A) in 5'-GATC-3' DNA motifs, generating a G<sup>m6</sup>ATC DNA motif  
84 (18). Other sequence motifs in a variety of prokaryotes can also carry m6A, depending on the  
85 species (16).

86

87 Potentially, differences in methylation status could be used by the innate immune system to  
88 discriminate pathogen-derived DNA from host DNA. For example, CpG motifs are mostly  
89 unmethylated in microbial genomes (16), but frequently methylated in DNA across a variety  
90 of human and mouse tissues (19, 20). This difference is recognized by the PRR TLR9 (16,  
91 17), leading to the production of inflammatory cytokines. Thus, recognition of CpG motifs  
92 forms a prime example for immune cells to discriminate host DNA from the microbial  
93 genome.

94

95 Much less is known about a putative immunogenic role of m6A in DNA. This modification is  
96 present in human and mouse DNA, but it appears to be extremely rare (in the range of 0.0005  
97 - 0.05% of all adenines) (21, 22) compared to the pervasive presence in prokaryotic DNA  
98 (16). This could thus be another basis for discrimination of host and pathogen DNA. Indeed, a  
99 previous study showed that systemic injection of DNA containing one G<sup>m6</sup>ATC motif resulted  
100 in increased blood levels on the proinflammatory cytokines TNF- $\alpha$ , IL-6 and IL-12 in mice  
101 (23). However, which cells respond to m6A-methylated DNA and through which innate  
102 immune sensors has not been studied (24). Furthermore, it is not known whether m6A  
103 recognition is restricted to G<sup>m6</sup>ATC motifs or whether it is also observed in another sequence  
104 context.

105

106 Here, we interrogated whether cytosolic delivery of G<sup>m6</sup>ATC DNA provokes immune cell  
107 response in innate immune cells, and if so, through which mechanism. We found that  
108 synthetic dsDNA containing G<sup>m6</sup>ATC motifs potentiates the response of murine macrophages  
109 and dendritic cells. This recognition requires STING-mediated signaling. Importantly, m6A-  
110 methylation does not boost immune responses *per se*, but depends on the nucleotide sequence  
111 context, a feature that is conserved in mouse and in human macrophages.

112

## 113 **Materials and Methods**

### 114 **Mice**

115 C57BL/6J mice (bred at the animal department of the Netherlands Cancer Institute,  
116 Amsterdam, The Netherlands), or mice deficient for MYD88xTRIF ((8, 25) hereafter *Myd88*<sup>-/-</sup>  
117 *Trif*<sup>-/-</sup>), for IPS-1 ((26), *Ips*<sup>-/-</sup>), or for STING ((27), *Sting*<sup>-/-</sup>) were used. All animal experiments  
118 were performed in accordance with institutional and national guidelines and approved by the  
119 Experimental Animal Committee of the Netherlands Cancer Institute, and of the Cincinnati  
120 Children's Hospital.

121

### 122 **Generation of murine bone marrow-derived macrophages and dendritic cells**

123 Bone marrow (BM) cells were obtained from mouse tibias and femurs. Briefly, after BM was  
124 flushed from the bones, red blood cells were lysed with red blood cell lysis buffer containing  
125 0.168 M NH<sub>4</sub>Cl, and washed once with PBS (28). Bone marrow-derived macrophages  
126 (BMMs) were generated by seeding 2 x 10<sup>6</sup> BM cells in a 100 mm non-tissue culture treated  
127 dish in RPMI 1640 (Lonza) supplemented with 10% FCS, 2 mM L-glutamine, 100 U/mL  
128 penicillin, 100 µg/mL streptomycin and β-mercaptoethanol together with 15% L-929  
129 conditioned medium containing recombinant M-CSF for 8 days at 37°C and 5% CO<sub>2</sub>.  
130 Medium was refreshed after 4 days.

131 Bone marrow-derived dendritic cells were generated with recombinant Flt3L (Flt3L-DCs) as  
132 previously described (28). Briefly, BM cells were cultured at 1.5 x 10<sup>6</sup> cells/ml for 9-10 days  
133 at 37°C and 5% CO<sub>2</sub> in complete DC medium (RPMI 1640 supplemented with 5% FCS, 2  
134 mM L-glutamine, 100 U/mL penicillin, 100 µg/mL streptomycin, and β-mercaptoethanol)  
135 supplemented with 30% conditioned medium from CHO cells producing murine recombinant  
136 Flt3L (29). BMMs and Flt3L-DC cultures were 95-99% F4/80<sup>+</sup> or CD11c<sup>+</sup>, respectively.

137

### 138 **Generation of human monocyte-derived macrophages**

139 Peripheral mononuclear blood cells (PBMC) were isolated from peripheral blood or buffy  
140 coats of healthy individuals collected by Sanquin Blood Supply (Amsterdam, Netherlands).  
141 The study was performed according to the Declaration of Helsinki (seventh revision, 2013).  
142 Written informed consent was obtained (Sanquin, Amsterdam, The Netherlands). Monocyte  
143 isolation was performed by gradient centrifugation on Percoll (Pharmacia, Uppsala, Sweden)  
144 following by magnetic-activated cell separation sorting using human CD14 Microbeads  
145 (Miltenyi Biotec). Freshly isolated CD14<sup>+</sup> monocytes were cultured for 7-8 days to  
146 differentiate into macrophages in IMDM medium supplemented with 10% FCS, 100 U/ml

147 penicillin, 100 µg/ml streptomycin, 2 mM L-glutamine and 20 ng/ml human macrophage  
148 colony-stimulating factor (M-CSF) (eBioscience).

149

### 150 **Generation of double stranded GATC and G<sup>m6</sup>ATC sequences**

151 HPLC-grade DNA oligos (Sigma-Aldrich) were dissolved in sterile endotoxin-free water,  
152 aliquoted and stored at -20°C. To generate dsDNA, equimolar amounts of m6A-methylated or  
153 unmethylated complementary oligos were linearized at 95°C, annealed at 75°C for 5 minutes,  
154 and slowly cooled down to room temperature. Double stranded sequences were aliquoted and  
155 stored at -20°C. dsDNA of GATC DNA was generated from multiple batches. For Tm  
156 analysis of each batch, 1 µg dsDNA was incubated with Sybr Green mix (Applied  
157 Biosystems) for 5 min at room temperature. Melting curve was determined on the Step-  
158 OnePlus™ Real-Time PCR System (Applied Biosystems) with the standard temperature  
159 gradient from 40-95°C.

160

### 161 **Stimulation and nucleic acid transfection**

162 After generation, murine BMMs and Flt3L-DCs, and human monocyte-derived macrophages  
163 were seeded for 1 h at 37°C and 5% CO<sub>2</sub> in 24- or 48-well non-tissue culture treated plates  
164 (BD) at a density of 1-2 x 10<sup>5</sup> cells/ml, before being cultured for indicated time points in FCS-  
165 free medium containing 1 µg/ml LPS (Invivogen), 1 µg/ml synthetic (B) form DNA analog  
166 poly(deoxyadenylic-deoxythymidylic) acid (poly(dA:dT)) (Invivogen) or 400 nM dsDNA  
167 containing GATC or G<sup>m6</sup>ATC sequences, or variants thereof. Cells were transfected with  
168 poly(dA:dT), m6A methylated or unmethylated dsDNA with 0.1% Lipofectamine 2000  
169 (Invitrogen) according to the manufacturer's protocol. Cells in medium alone (untransfected,  
170 ctrl) or in medium containing Lipofectamine 2000 (mock) were as controls for DNA  
171 stimulation and DNA transfection, respectively. After indicated time points, cells were  
172 harvested by scraping from culture plates for analysis.

173

### 174 **Antibodies and Flow cytometry**

175 BMMs and Flt3L-DCs were stained with antibodies directed against murine F4/80-APC  
176 (clone BM8), CD69-FITC (clone H1.2F3), CD11c-APC (clone N418), and CD86-FITC  
177 (clone GL1) (eBioscience). Stainings were performed in the presence of anti-CD16/CD32  
178 block (2.4G2; kind gift from Louis Boon, Bioceros). Flow cytometry was performed with  
179 LSRII (BD Biosciences), and data were analysed with FlowJo software v7.6.5. (Tree Star,  
180 Inc).

181

182 **Quantitative Reverse Transcriptase-PCR**

183 Total RNA was extracted using TRIzol reagent (Invitrogen). cDNA was generated with  
184 SuperScript III reverse transcriptase (Invitrogen), dNTPs (Fermentas) and Random Primer  
185 (Promega) according to manufacturer's protocol. Quantitative Reverse Transcriptase-PCR  
186 (RT-qPCR) was performed using SYBR Green mix on the Step-OnePlus™ System (Applied  
187 Biosystems). Primers used for gene expression analysis (Table 1) were validated by serial  
188 dilutions. Gene expression was normalized to *L32* (mouse genes) or *18s* (human genes).

189

190 **Statistical analysis**

191 Data were analyzed for statistical significance with 2-tailed unpaired or paired Student's *t*-  
192 test, as indicated (Prism v5, GraphPad Software). Results are expressed as mean  $\pm$  standard  
193 deviation (SD) and were considered statistically significant with *p* values  $< 0.05$ .

194

195 **Results**

196

197 **Cytosolic delivery of m6A-methylated dsDNA enhances macrophage and DC activation**

198 We first examined whether N<sup>6</sup>-methyl-adenine (m6A) modifications in GATC motifs alters  
199 the immunogenicity of dsDNA for macrophages and dendritic cells. The sequence we selected  
200 for analysis is present in the genome of several bacterial strains, such as *Escherichia coli*,  
201 *Salmonella enterica* and *Klebsiella pneumoniae*. The 34bp long sequence contains a cluster of  
202 three GATC motifs but lacks CpG motifs (Table 2). To exclude other immune stimulants in  
203 the preparations, we used HPLC- purified oligos that were dissolved in endotoxin-free H<sub>2</sub>O.  
204 m6A modifications are abundant in bacteria on both DNA strands, which prompted us to  
205 study the response to double stranded DNA (dsDNA). We determined the integrity of the  
206 generated dsDNA by measuring the melting temperature (T<sub>m</sub>) of the m6A-methylated  
207 (GATC DNA) or unmethylated (G<sup>m6</sup>ATC DNA) dsDNA. As expected, m6A modifications  
208 reduced the T<sub>m</sub> of the dsDNA by ~5°C, as a consequence of altering the structure and by  
209 destabilizing double stranded bonds (Table 2).

210

211 Recognition of dsDNA by PRRs occurs primarily in the cytosol (3, 4). Therefore, to  
212 determine whether m6A modifications alter the immunogenicity of dsDNA, we delivered the  
213 dsDNA to marrow-derived macrophages from C57Bl/6J mice (BMMs) through transfection  
214 with Lipofectamine 2000. As a control, we transfected Poly(dA:dT), a well-studied (B) form  
215 dsDNA that elicits potent type I IFN response in both mouse and human cells (4). Within 6 h  
216 of stimulation BMMs transfected with poly(dA:dT) showed increased expression of CD69  
217 (Fig. 1A), an early macrophage activation marker (8, 30). Transfection with the 34bp  
218 synthetic DNA sequences also resulted in increased CD69 expression (Fig. 1A). CD69  
219 protein expression was even higher when cells were transfected G<sup>m6</sup>ATC DNA compared to  
220 unmethylated DNA (Fig. 1A). CD69 expression was also increased at later time points, i.e.  
221 24 h after transfection with G<sup>m6</sup>ATC DNA (Fig. 1B). The induction of CD69 expression  
222 depended on intracellular delivery of the dsDNA, because the delivery of GATC or G<sup>m6</sup>ATC  
223 DNA without Lipofectamine 2000 did not induce expression of CD69 (Fig. 1B).

224

225 Macrophage activation with dsDNA leads to rapid transcription of inflammatory molecules  
226 (31). To determine whether m6A-methylation alters the inflammatory gene expression profile  
227 of macrophages, we measured the mRNA levels of *Il6*, *Il10*, *Tnfα*, *Ifnβ* and *iNos*. *Il6*, *Il10*,  
228 and *Tnfα* mRNA levels were increased upon transfection with both DNA variants, and it



229 occurred irrespective of the methylation status of the dsDNA (Fig. 1C). We also observed  
230 increased mRNA levels of the early inflammatory genes *Ifn $\beta$*  and *iNos*, and both transcripts  
231 were more potently induced upon transfection with G<sup>m6</sup>ATC DNA (Fig. 1C; p=0.005 and  
232 p<0.0001, respectively). Similarly, bone-marrow derived DCs generated with Flt3L showed  
233 increased levels of the costimulatory molecule CD86 upon transfection with G<sup>m6</sup>ATC DNA  
234 when compared to transfection with GATC DNA (Fig. 1D). Thus, m6A modification in  
235 GATC motifs promotes the gene expression of several key inflammatory molecules.

236

### 237 **STING drives immune activation for both m6A-modified and unmodified DNA**

238 We next interrogated which PRR mediates the recognition of the m6A-methylated dsDNA.  
239 TLR3, TLR7/8 and TLR9 which detect nucleic acids (32) signal through MYD88 and TRIF,  
240 the key adaptor molecules downstream of TLR signaling (8, 9). To determine whether TLRs  
241 can sense methylated dsDNA, we generated BMMs from *Myd88<sup>-/-</sup>Trif<sup>-/-</sup>* mice. As expected,  
242 *Myd88<sup>-/-</sup>Trif<sup>-/-</sup>* BMMs failed to respond to the TLR4 ligand LPS after 6 h of stimulation, but  
243 maintained their ability to respond to poly(dA:dT), which is sensed in an TLR-independent  
244 manner (14)(Fig. 2A, B). Transfection with GATC and G<sup>m6</sup>ATC DNA resulted in identical  
245 effects in *Myd88<sup>-/-</sup>Trif<sup>-/-</sup>* and *wt* BMMs, with higher CD69 expression upon transfection with  
246 G<sup>m6</sup>ATC DNA (Fig. 2A, B). This suggests that TLRs are dispensable for dsDNA recognition.  
247 The adaptor protein IPS-1 that acts downstream of the dsRNA recognizing RIG-I-like  
248 receptors (26, 33) was also not required for either GATC, or G<sup>m6</sup>ATC DNA recognition (Fig.  
249 2C).

250

251 STING was identified as a key adaptor molecule of cytosolic DNA sensing (27). In line with  
252 this, transfection of *Sting<sup>-/-</sup>* BMMs with dsDNA did not result in expression of CD69 protein  
253 upon transfection (Fig. 2D). The lack of recognition occurred independently of the m6A  
254 modification (Fig. 2D). Thus, STING is required to recognize cytosolic dsDNA, and this  
255 recognition is permissive to epigenetic modifications within the DNA.

256

### 257 **Enhanced BMM-activation by m6A methylated DNA is sequence specific**

258 We then interrogated whether the increased immunogenicity of G<sup>m6</sup>ATC DNA was a general  
259 feature of m6A methylated DNA. In fact, in addition to the GATC sequence-specific Dam  
260 Methyltransferase (MTse), a number of other m6A DNA MTses have been described (16, 18,  
261 34). For instance, *Thermoplasma* express a m6A MTse that recognizes CATG sequences  
262 (16). Another m6A MTse found in *Helicobacter pylori* recognizes adenine within GTAC

263 motifs (35). To determine whether m6A methylations within these motifs also increased the  
264 immunogenicity of DNA, we generated dsDNA with the identical 34 bp core sequence, but  
265 with the GATC motifs exchanged to m6A-methylated or unmethylated CATG and GTAC  
266 motifs (Table 2). Similar to the GATC containing DNA, C<sup>m6</sup>ATG and GT<sup>m6</sup>AC DNA  
267 displayed a reduced T<sub>m</sub> compared to the respective unmethylated dsDNA (Table 2),  
268 indicating that m6A methylation also affects the strength of dsDNA bonds in these sequences.

269

270 Comparable to G<sup>m6</sup>ATC DNA, transfecting BMMs with DNA containing GT<sup>m6</sup>AC also  
271 induced higher CD69 expression levels than its unmethylated counterpart (Fig. 3A). However,  
272 this was not the case for C<sup>m6</sup>ATG DNA. Transfecting BMMs with DNA containing C<sup>m6</sup>ATG  
273 resulted in lower CD69 expression than transfection with the unmethylated DNA (Fig. 3A).  
274 Furthermore, whereas G<sup>m6</sup>ATC and GT<sup>m6</sup>AC were also superior in increasing *Ifnβ*, *iNos* and  
275 *Cxcl10* transcript levels compared to the respective unmethylated DNA, C<sup>m6</sup>ATG-containing  
276 DNA rather hampered the induction of these key inflammatory genes (Fig. 3B-D). Thus, the  
277 observed enhanced immunogenicity of m6A methylation in DNA sequences is sequence-  
278 specific.

279

### 280 **Sequence-specific recognition of m6A methylated DNA is conserved in human** 281 **macrophages**

282 To determine whether the observed differences in sequence-specific immunogenicity was also  
283 found in humans, we generated M-CSF derived macrophages from peripheral blood derived  
284 monocytes and compared the gene expression levels of effector molecules upon DNA  
285 transfection. Comparable to murine macrophages, transfecting human macrophages with  
286 G<sup>m6</sup>ATC-containing DNA resulted in higher induction of *CXCL10* mRNA compared to  
287 unmethylated DNA (Fig. 4A). The increased immunogenicity of DNA was also conserved for  
288 GT<sup>m6</sup>AC DNA (Fig. 4A). In contrast, transfecting macrophages with C<sup>m6</sup>ATG DNA again  
289 lowered the induction of *CXCL10* mRNA (Fig. 4A).

290

291 Because the C<sup>m6</sup>ATG sequence in transfected DNA blocked the induction of pro-  
292 inflammatory molecules in macrophages, we investigated whether this sequence instead  
293 induced the expression of a prototypic anti-inflammatory cytokine, IL-10. However, we did  
294 not detect increased *IL10* mRNA levels with any of the m6A methylated DNA sequences  
295 when compared to mock-transfected cells (Fig. 4B). In conclusion, the sequence-specific  
296 immunogenicity by m6A-methylated DNA motifs is conserved between mouse and human.

297 **Discussion**

298 Recognition of intracellular dsDNA is an important process that can occur during microbial  
299 infection and after cell damage (3). Whereas length and structure modulate the  
300 immunogenicity of DNA, we show here that this is also true for m6A-methylation. This  
301 increased antigen recognition is observed at all different tested time points and doses. Immune  
302 recognition of m6A-methylated DNA is identical to unmethylated DNA in that it is  
303 independent of MyD88/TRIF and IPS-1 signaling but requires STING. Which molecule  
304 recognizes the sequence and how the m6A methylation influences the immunogenicity is yet  
305 to be determined. Interestingly, in *E. coli*, m6A-methylation was shown to affect the  
306 oligonucleotide structure and - as a consequence - the binding to the DNA binding protein  
307 IHF (36). Here, we observed different  $T_m$  in the presence or absence of m6A-methylation in  
308 the dsDNA, indicative for alterations in the secondary structure of DNA. This alteration could  
309 potentiate the binding affinity of DNA to its cytosolic receptor. Although less likely, m6A-  
310 methylation could also lead to limited recognition by cytosolic nucleases and thus support a  
311 prolonged exposure to DNA sensors, or enhanced transfection efficiency of DNA. It is  
312 tempting to speculate that  $C^{m6}ATG$  motifs differ in structure from  $G^{m6}ATC$  and  $GT^{m6}AC$   
313 motifs, which interferes with recognition of DNA sensors and thus dampens the  
314 immunogenicity of dsDNA.

315

316 In conclusion, our study identifies a new role for m6A-DNA methylation in regulating innate  
317 immune responses to cytosolic DNA. Whether the observed sequence-specific recognition of  
318 m6A-methylated DNA is a specific feature of synthetic DNA or stems from different immune  
319 responses to various bacterial strains is yet to be determined. Overall, our findings may help  
320 to increase the immunogenicity of DNA vaccines and could potentially pave the way to  
321 unravel novel mechanisms of pathogen recognition and evasion in innate immune cells.

322

323

324

325

326 **Acknowledgements**

327

328 We thank A. Popovski for technical help, and S. Naik for providing murine Flt3L to generate  
329 BM-derived dendritic cells, and J. Freen-van Heeren for critical reading of the manuscript.  
330 The 2.4G2 antibody was kindly provided by Louis Boon (Bioceros, Utrecht).

331 **References**

- 332 1. Akira, S., S. Uematsu, and O. Takeuchi. 2006. Pathogen recognition and innate immunity.  
333 *Cell* 124: 783–801.
- 334 2. Takeuchi, O., and S. Akira. 2010. Pattern recognition receptors and inflammation. *Cell* 140:  
335 805–820.
- 336 3. Roers, A., B. Hiller, and V. Hornung. 2016. Recognition of Endogenous Nucleic Acids by  
337 the Innate Immune System. *Immunity* 44: 739–754.
- 338 4. Hornung, V., and E. Latz. 2010. Intracellular DNA recognition. *Nat. Rev. Immunol.* 10:  
339 123–130.
- 340 5. Luecke, S., and S. R. Paludan. 2017. Molecular requirements for sensing of intracellular  
341 microbial nucleic acids by the innate immune system. *Cytokine* 98: 4–14.
- 342 6. Akira, S., and K. Takeda. 2004. Toll-like receptor signalling. *Nat. Rev. Immunol.* 4: 499–  
343 511.
- 344 7. Alexopoulou, L., A. C. Holt, R. Medzhitov, and R. A. Flavell. 2001. Recognition of  
345 double-stranded RNA and activation of NF-kappaB by Toll-like receptor 3. *Nature* 413: 732–  
346 738.
- 347 8. Yamamoto, M., S. Sato, H. Hemmi, K. Hoshino, T. Kaisho, H. Sanjo, O. Takeuchi, M.  
348 Sugiyama, M. Okabe, K. Takeda, and S. Akira. 2003. Role of adaptor TRIF in the MyD88-  
349 independent toll-like receptor signaling pathway. *Science* 301: 640–643.
- 350 9. Diebold, S. S., T. Kaisho, H. Hemmi, S. Akira, and C. Reis e Sousa. 2004. Innate antiviral  
351 responses by means of TLR7-mediated recognition of single-stranded RNA. *Science* 303:  
352 1529–1531.
- 353 10. Takeuchi, O., and S. Akira. 2009. Innate immunity to virus infection. *Immunol. Rev.* 227:  
354 75–86.
- 355 11. Sun, L., J. Wu, F. Du, X. Chen, and Z. J. Chen. 2013. Cyclic GMP-AMP synthase is a  
356 cytosolic DNA sensor that activates the type I interferon pathway. *Science* 339: 786–791.
- 357 12. Hornung, V., A. Ablasser, M. Charrel-Dennis, F. Bauernfeind, G. Horvath, D. R. Caffrey,  
358 E. Latz, and K. A. Fitzgerald. 2009. AIM2 recognizes cytosolic dsDNA and forms a caspase-  
359 1-activating inflammasome with ASC. *Nature* 458: 514–518.
- 360 13. Civril, F., T. Deimling, C. C. de Oliveira Mann, A. Ablasser, M. Moldt, G. Witte, V.  
361 Hornung, and K.-P. Hopfner. 2013. Structural mechanism of cytosolic DNA sensing by  
362 cGAS. *Nature* 498: 332–337.
- 363 14. Ishii, K. J., C. Coban, H. Kato, K. Takahashi, Y. Torii, F. Takeshita, H. Ludwig, G. Sutter,  
364 K. Suzuki, H. Hemmi, S. Sato, M. Yamamoto, S. Uematsu, T. Kawai, O. Takeuchi, and S.  
365 Akira. 2006. A Toll-like receptor-independent antiviral response induced by double-stranded  
366 B-form DNA. *Nat. Immunol.* 7: 40–48.
- 367 15. Herzner, A.-M., C. A. Hagmann, M. Goldeck, S. Wolter, K. Kubler, S. Wittmann, T.  
368 Gramberg, L. Andreeva, K.-P. Hopfner, C. Mertens, T. Zillinger, T. Jin, T. S. Xiao, E. Bartok,  
369 C. Coch, D. Ackermann, V. Hornung, J. Ludwig, W. Barchet, G. Hartmann, and M. Schlee.  
370 2015. Sequence-specific activation of the DNA sensor cGAS by Y-form DNA structures as  
371 found in primary HIV-1 cDNA. *Nat. Immunol.* 16: 1025–1033.
- 372 16. Blow, M. J., T. A. Clark, C. G. Daum, A. M. Deutschbauer, A. Fomenkov, R. Fries, J.  
373 Froula, D. D. Kang, R. R. Malmstrom, R. D. Morgan, J. Posfai, K. Singh, A. Visel, K.  
374 Wetmore, Z. Zhao, E. M. Rubin, J. Korlach, L. A. Pennacchio, and R. J. Roberts. 2016. The  
375 Epigenomic Landscape of Prokaryotes. *PLoS Genet.* 12: e1005854.
- 376 17. Clark, T. A., I. A. Murray, R. D. Morgan, A. O. Kislyuk, K. E. Spittle, M. Boitano, A.  
377 Fomenkov, R. J. Roberts, and J. Korlach. 2012. Characterization of DNA methyltransferase  
378 specificities using single-molecule, real-time DNA sequencing. *Nucleic Acids Res.* 40: e29.
- 379 18. Wion, D., and J. Casadesus. 2006. N6-methyl-adenine: an epigenetic signal for DNA-  
380 protein interactions. *Nat. Rev. Microbiol.* 4: 183–192.

- 381 19. Lister, R., M. Pelizzola, R. H. Dowen, R. D. Hawkins, G. Hon, J. Tonti-Filippini, J. R.  
382 Nery, L. Lee, Z. Ye, Q.-M. Ngo, L. Edsall, J. Antosiewicz-Bourget, R. Stewart, V. Ruotti, A.  
383 H. Millar, J. A. Thomson, B. Ren, and J. R. Ecker. 2009. Human DNA methylomes at base  
384 resolution show widespread epigenomic differences. *Nature* 462: 315–322.
- 385 20. Stubbs, T. M., M. J. Bonder, A.-K. Stark, F. Krueger, F. von Meyenn, O. Stegle, and W.  
386 Reik. 2017. Multi-tissue DNA methylation age predictor in mouse. *Genome Biol.* 18: 68.
- 387 21. Xiao, C.-L., S. Zhu, M. He, D. Chen, Q. Zhang, Y. Chen, G. Yu, J. Liu, S.-Q. Xie, F. Luo,  
388 Z. Liang, D.-P. Wang, X.-C. Bo, X.-F. Gu, K. Wang, and G.-R. Yan. 2018. N(6)-  
389 Methyladenine DNA Modification in the Human Genome. *Mol. Cell* 71: 306–318.e7.
- 390 22. Wu, T. P., T. Wang, M. G. Seetin, Y. Lai, S. Zhu, K. Lin, Y. Liu, S. D. Byrum, S. G.  
391 Mackintosh, M. Zhong, A. Tackett, G. Wang, L. S. Hon, G. Fang, J. A. Swenberg, and A. Z.  
392 Xiao. 2016. DNA methylation on N(6)-adenine in mammalian embryonic stem cells. *Nature*  
393 532: 329–333.
- 394 23. Tsuchiya, H., T. Matsuda, H. Harashima, and H. Kamiya. 2005. Cytokine induction by a  
395 bacterial DNA-specific modified base. *Biochem. Biophys. Res. Commun.* 326: 777–781.
- 396 24. Roberts, T. L., J. A. Dunn, T. D. Terry, M. P. Jennings, D. A. Hume, M. J. Sweet, and K.  
397 J. Stacey. 2005. Differences in macrophage activation by bacterial DNA and CpG-containing  
398 oligonucleotides. *J. Immunol.* 175: 3569–3576.
- 399 25. Adachi, O., T. Kawai, K. Takeda, M. Matsumoto, H. Tsutsui, M. Sakagami, K. Nakanishi,  
400 and S. Akira. 1998. Targeted disruption of the MyD88 gene results in loss of IL-1- and IL-18-  
401 mediated function. *Immunity* 9: 143–150.
- 402 26. Kumar, H., T. Kawai, H. Kato, S. Sato, K. Takahashi, C. Coban, M. Yamamoto, S.  
403 Uematsu, K. J. Ishii, O. Takeuchi, and S. Akira. 2006. Essential role of IPS-1 in innate  
404 immune responses against RNA viruses. *J. Exp. Med.* 203: 1795–1803.
- 405 27. Ishikawa, H., and G. N. Barber. 2008. STING is an endoplasmic reticulum adaptor that  
406 facilitates innate immune signalling. *Nature* 455: 674–678.
- 407 28. Naik, S. H., M. O’Keeffe, A. Proietto, H. H. K. Shortman, and L. Wu. 2010. CD8+, CD8-,  
408 and plasmacytoid dendritic cell generation in vitro using flt3 ligand. *Methods Mol. Biol.* 595:  
409 167–176.
- 410 29. Naik, S. H., A. I. Proietto, N. S. Wilson, A. Dakic, P. Schnorrer, M. Fuchsberger, M. H.  
411 Lahoud, M. O’Keeffe, Q. Shao, W. Chen, J. A. Villadangos, K. Shortman, and L. Wu. 2005.  
412 Cutting edge: generation of splenic CD8+ and CD8- dendritic cell equivalents in Fms-like  
413 tyrosine kinase 3 ligand bone marrow cultures. *J. Immunol.* 174: 6592–6597.
- 414 30. Marzio, R., E. Jirillo, A. Ransijn, J. Mael, and S. B. Corradin. 1997. Expression and  
415 function of the early activation antigen CD69 in murine macrophages. *J. Leukoc. Biol.* 62:  
416 349–355.
- 417 31. Stetson, D. B., and R. Medzhitov. 2006. Recognition of cytosolic DNA activates an IRF3-  
418 dependent innate immune response. *Immunity* 24: 93–103.
- 419 32. Li, X., S. Jiang, and R. I. Tapping. 2010. Toll-like receptor signaling in cell proliferation  
420 and survival. *Cytokine* 49: 1–9.
- 421 33. Kawai, T., K. Takahashi, S. Sato, C. Coban, H. Kumar, H. Kato, K. J. Ishii, O. Takeuchi,  
422 and S. Akira. 2005. IPS-1, an adaptor triggering RIG-I- and Mda5-mediated type I interferon  
423 induction. *Nat. Immunol.* 6: 981–988.
- 424 34. Julio, S. M., D. M. Heithoff, D. Provenzano, K. E. Klose, R. L. Sinsheimer, D. A. Low,  
425 and M. J. Mahan. 2001. DNA adenine methylase is essential for viability and plays a role in  
426 the pathogenesis of *Yersinia pseudotuberculosis* and *Vibrio cholerae*. *Infect. Immun.* 69:  
427 7610–7615.
- 428 35. Humbert, O., and N. R. Salama. 2008. The *Helicobacter pylori* HpyAXII restriction-  
429 modification system limits exogenous DNA uptake by targeting GTAC sites but shows  
430 asymmetric conservation of the DNA methyltransferase and restriction endonuclease

431 components. *Nucleic Acids Res.* 36: 6893–6906.  
432 36. Polaczek, P., K. Kwan, and J. L. Campbell. 1998. GATC motifs may alter the  
433 conformation of DNA depending on sequence context and N6-adenine methylation status:  
434 possible implications for DNA-protein recognition. *Mol. Gen. Genet.* 258: 488–493.

435 **Figure legends**

436 **Figure 1. Cytosolic recognition of m6A-methylated dsDNA potentiates macrophage and**  
437 **dendritic cell activation. (A)** Representative histogram of CD69 expression of bone marrow-  
438 derived macrophages (BMMs) 6 h after transfection with 0.1% Lipofectemine 2000 and 1  
439  $\mu\text{g/ml}$  poly(dA:dT) (*left panel*), 400 nM unmethylated (GATC) or 400 nM methylated  
440 ( $\text{G}^{\text{m6}}$ ATC) DNA (*middle panel*). Transfection with 0.1% Lipofectamine 2000 alone served as  
441 control (mock). *Right panel*: CD69 expression levels (Geometric mean fluorescence intensity,  
442 geoMFI) compiled from five independently performed experiments. **(B)** CD69 expression of  
443 BMMs stimulated for 24 h with  $1\mu\text{g/ml}$  poly(dA:dT), or with GATC or  $\text{G}^{\text{m6}}$ ATC DNA in the  
444 presence (*middle panel*) or absence (*right panel*) of Lipofectemine. Lipofectamine mock  
445 treated or untreated BMMs (ctrl) served as controls. **(C)** *Il6*, *Il10*, *Tnf $\alpha$* , *Ifn $\beta$* , and *iNos* mRNA  
446 levels of BMMs activated for 6 h with indicated reagents. **B** and **C** are representative of two  
447 independently performed experiments. **(D)** Representative histograms (left) of CD86  
448 expression and compiled data from 2 independently performed experiments (right) of BM-  
449 derived dendritic cells (Flt3L-DCs) that were mock transfected or transfected overnight with  
450 poly(dA:dT), GATC or  $\text{G}^{\text{m6}}$ ATC DNA. Paired (A-E) or unpaired (C) Student's *t*-test. ( $*p <$   
451  $0.05$ ,  $**p < 0.01$ ,  $***p < 0.001$ ).

452

453 **Figure 2. STING is required for macrophage activation by dsDNA irrespective of**  
454 **methylation status.** CD69 expression levels determined by flow cytometry of BMMs from  
455 (A) *wt*, (B) *Myd88<sup>-/-</sup>Trif<sup>-/-</sup>*, (C) *Ips1<sup>-/-</sup>* or (D) *Sting<sup>-/-</sup>* mice activated for 6 h with  $1\mu\text{g/ml}$  LPS,  
456 or left untreated (Ctrl; *left panels*). Alternatively, BMMs were transfected with poly(dA:dT)  
457 or mock-transfected (*middle panel*), or were transfected with GATC and  $\text{G}^{\text{m6}}$ ATC DNA,  
458 respectively (*right panel*). Data are representative of two independently performed  
459 experiments.

460

461 **Figure 3. BMMs recognize m6A-methylated dsDNA in a sequence-dependent manner.**  
462 **(A)** BMMs were mock transfected or transfected for 6 h with poly(dA:dT), (*left panel*), with  
463 GATC or  $\text{G}^{\text{m6}}$ ATC DNA (*second panel*), CATG or  $\text{C}^{\text{m6}}$ ATG (*third panel*), or GTAC or GT  
464  $\text{m}^6$ AC DNA (*right panel*). For sequences see Table 2. Top row: Representative histograms of  
465 CD69 expression measured by flow cytometry. Bottom row: Compiled data from BMM

466 cultures of four mice from two independently performed experiments. **(B-D)** mRNA levels of  
467 *Ifn $\beta$*  **(B)** *iNos* **(C)**, and *Cxcl10* **(D)** in BMMs after 6 h stimulation with indicated reagents,  
468 normalized to the expression of *L32*. Paired Student's *t*-test. (\* $p < 0.05$ , \*\* $p < 0.01$ , \*\*\* $p <$   
469 0.001. ns = not significant).

470

471 **Figure 4: Sequence-specific recognition of m6A-methylated dsDNA is conserved in**  
472 **human macrophages. (A, B)** M-CSF induced macrophages from human peripheral blood  
473 derived monocytes were transfected with poly(dA:dT) (*left panel*), GATC or G<sup>m6</sup>ATC DNA  
474 (*second panel*), CATG or C<sup>m6</sup>ATG (*third panel*), or GTAC or GT<sup>m6</sup>AC DNA (*right panel*).  
475 mRNA levels of *CXCL10* **(A)** and *IL10* **(B)** were measured and normalized to the expression  
476 of *18S*. n = 7 independent donors, measured in four independently performed experiments.  
477 Paired Student's *t*-test. (\* $p < 0.05$ , \*\* $p < 0.01$ . ns = not significant).

478

bioRxiv preprint doi: <https://doi.org/10.1101/742072>; this version posted August 21, 2019. The copyright holder for this preprint (which was not certified by peer review) is the author/funder. All rights reserved. No reuse allowed without permission.

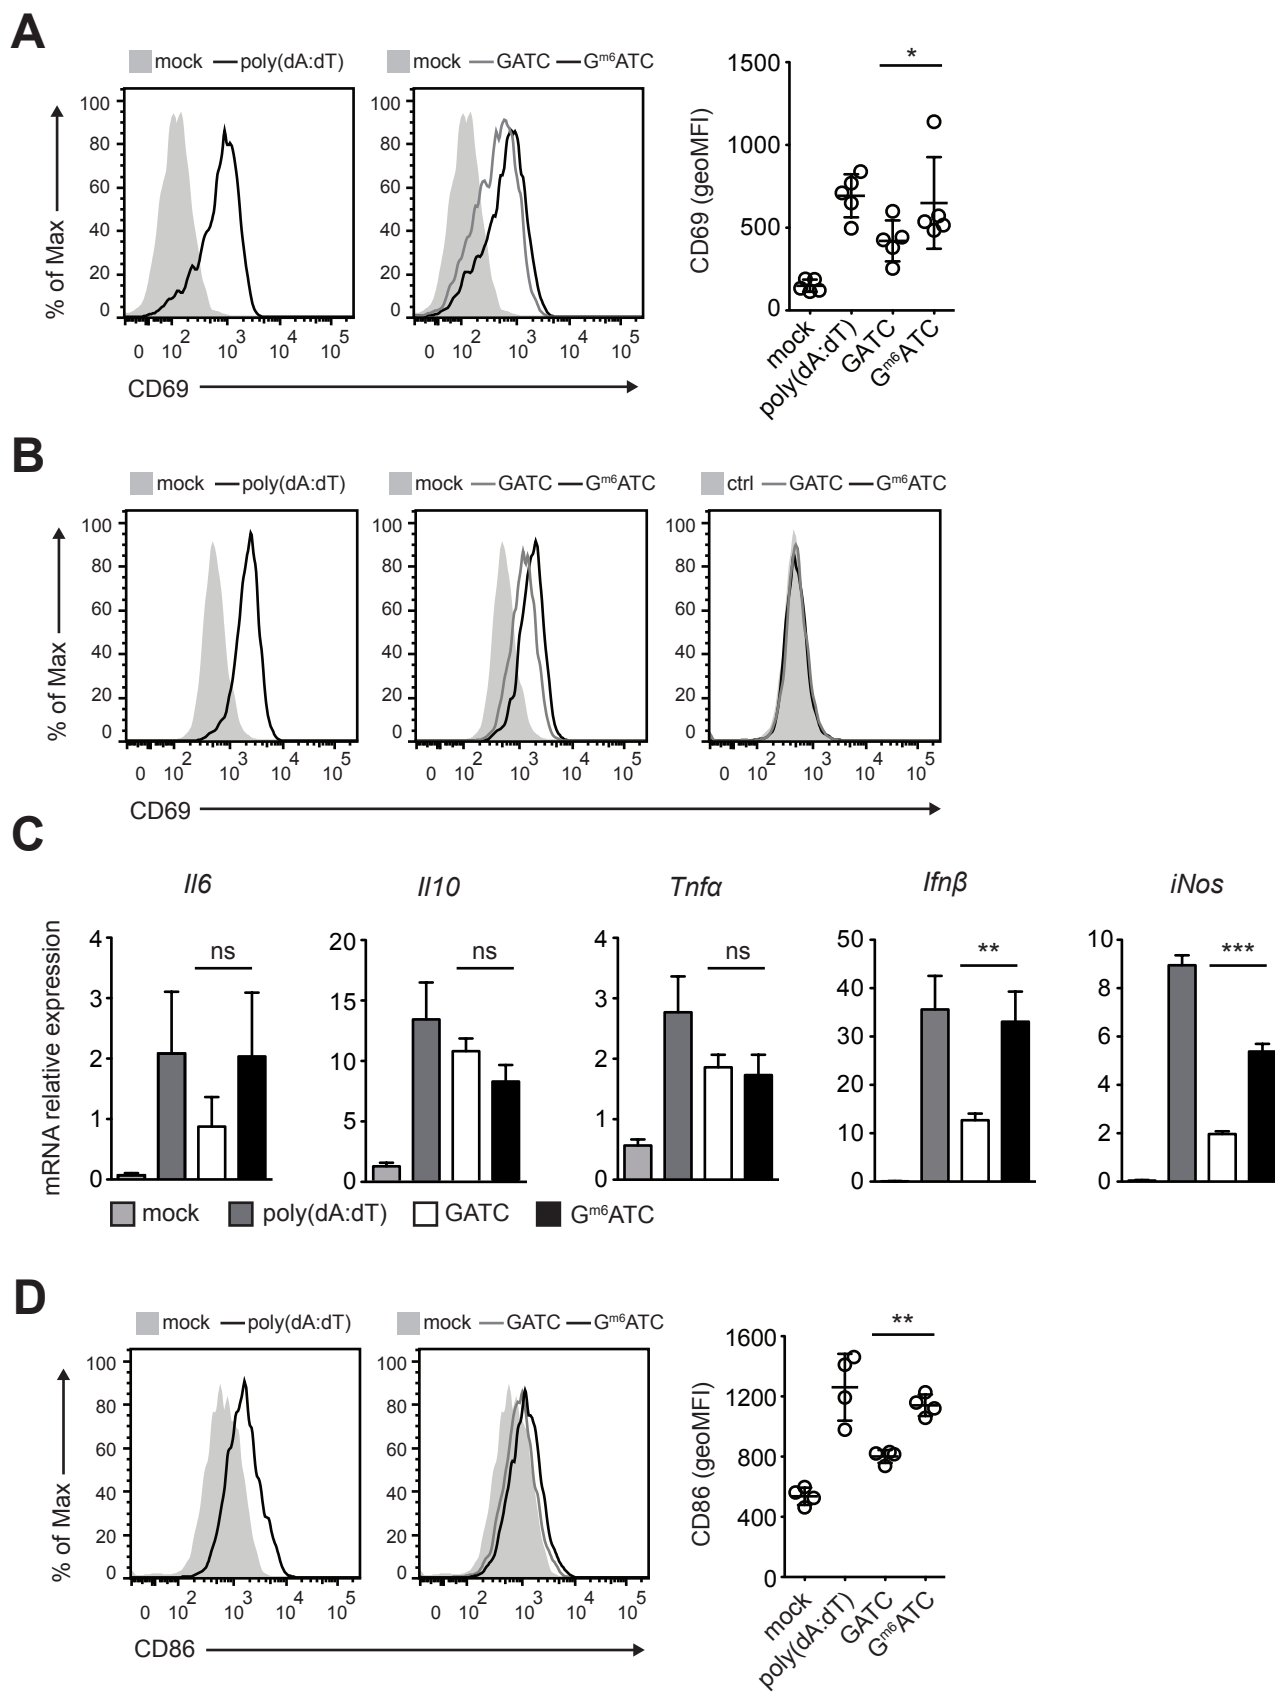



bioRxiv preprint doi: <https://doi.org/10.1101/742072>; this version posted August 21, 2019. The copyright holder for this preprint (which was not certified by peer review) is the author/funder. All rights reserved. No reuse allowed without permission.

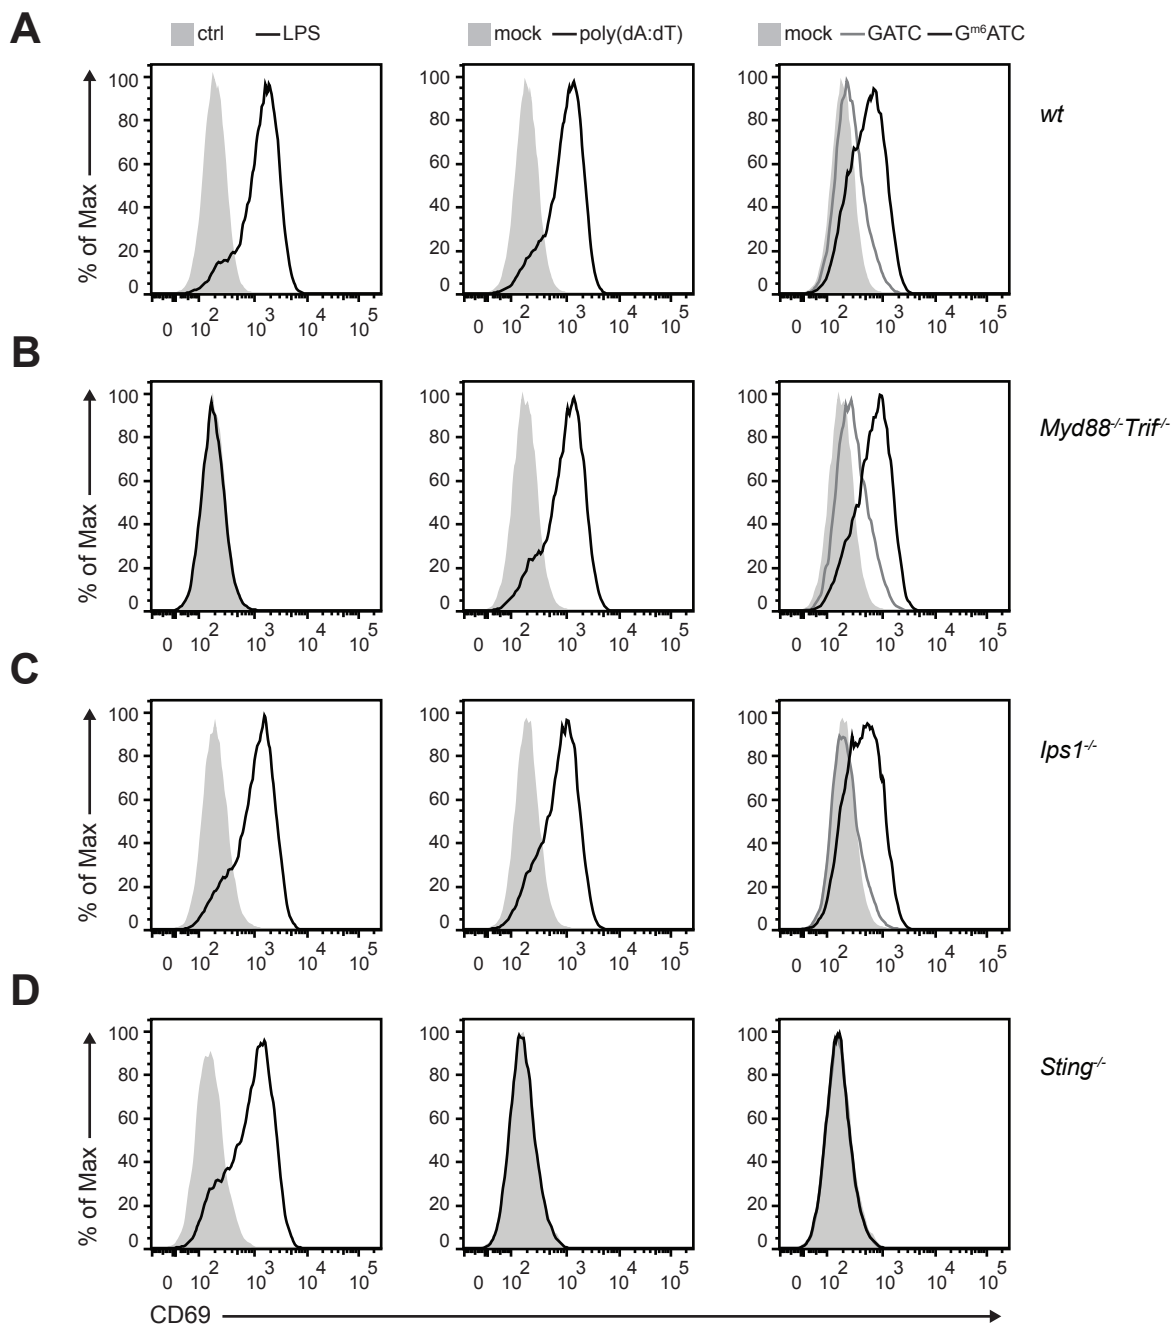

bioRxiv preprint doi: <https://doi.org/10.1101/742072>; this version posted August 21, 2019. The copyright holder for this preprint (which was not certified by peer review) is the author/funder. All rights reserved. No reuse allowed without permission.

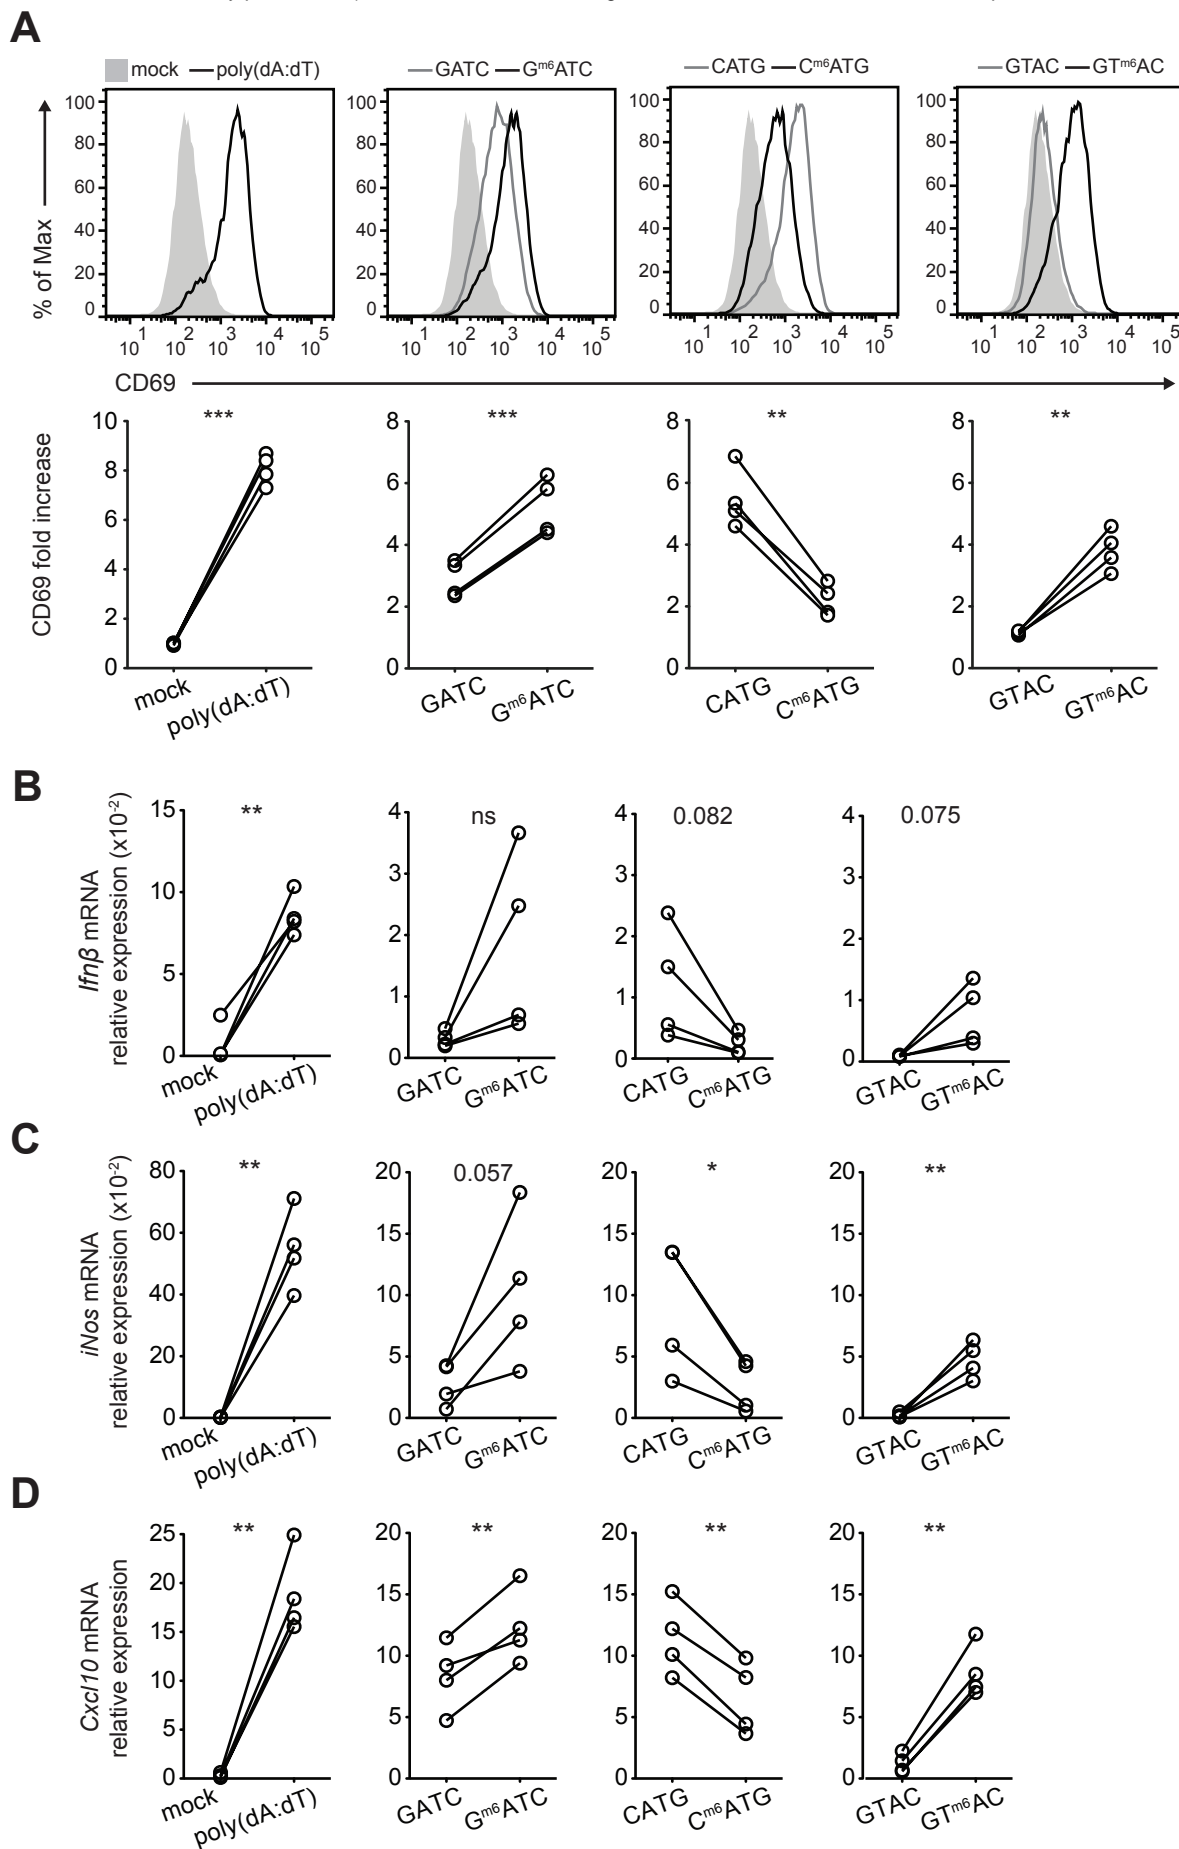

bioRxiv preprint doi: <https://doi.org/10.1101/742072>; this version posted August 21, 2019. The copyright holder for this preprint (which was not certified by peer review) is the author/funder. All rights reserved. No reuse allowed without permission.

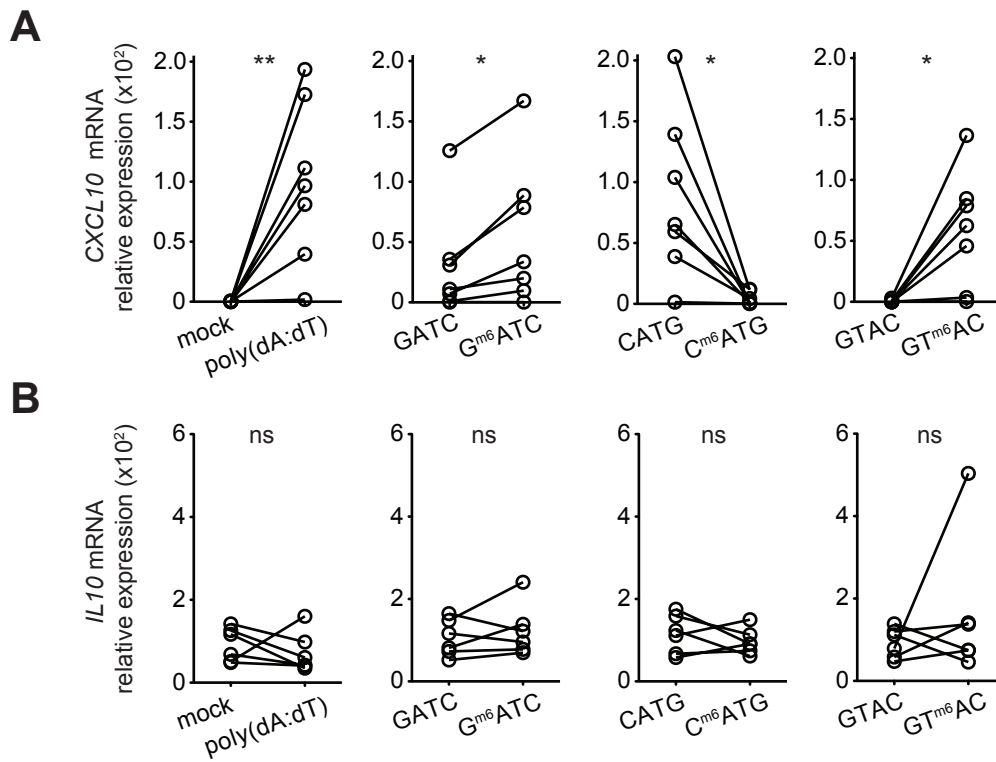

| <b>Species</b> | <b>Gene name</b> | <b>Primer forward (5'--3')</b> | <b>Primer reverse (5'--3')</b> |
|----------------|------------------|--------------------------------|--------------------------------|
| Mouse          | <i>Il6</i>       | GTTCTCTGGGAAATCGTGGA           | TGTACTIONCAGGTAGCTATGG         |
| Mouse          | <i>Il10</i>      | AGCATGGCCCAGAAATCAAG           | TGAAGACCCTCAGGATGCG            |
| Mouse          | <i>Tnfa</i>      | AGGGTCTGGGCCATAGAACT           | CCACCACGCTCTTCTGTCTAC          |
| Mouse          | <i>Ifnb</i>      | ATGGTGGTCCGAGCAGAGAT           | CCACCACTCATTCTGAGGCA           |
| Mouse          | <i>iNos</i>      | CAGCTGGGCTGACAAACCTT           | CATTGGAAGTGAAGCGTTTCG          |
| Mouse          | <i>Cxcl10</i>    | CGATGACGGGCCAGTGAGAATG         | TCAACACGTGGGCAGGATAGGCT        |
| Mouse          | <i>L32</i>       | GGATCTGGCCCTTGAACCTT           | GAAACTGGCCGAAACCCA             |
| Human          | <i>IL10</i>      | GGTTGCCAAGCCTTGTCTGA           | AGGGAGTTCACATGCGCCT            |
| Human          | <i>CXCL10</i>    | GGAAGGTTAATGTTTCATCATCCTAAGC   | TAGTACCCTTGGAAGATGGGAAAG       |
| Human          | <i>18S</i>       | AGACAACAAGCTCCGTGAAGA          | CAGAAGTGACGCAGCCCTCTA          |

**Table 1.** Primers used for RT-qPCR analysis.

| DNA sequence                                                                    | Tm (°C) | Recognition motif | Methylase                       | Bacterial strains                                                                                                                                                                                           | References |
|---------------------------------------------------------------------------------|---------|-------------------|---------------------------------|-------------------------------------------------------------------------------------------------------------------------------------------------------------------------------------------------------------|------------|
| AAGGATCTCAAGAAGATCCTTTGATCTTTTCTAC                                              | 68.7    |                   |                                 | <i>Escherichia coli</i><br><i>Klebsiella p</i><br><i>Salmonella enterica</i><br><i>Mycoplasma mycoides</i><br><i>Legionella pneumophila</i><br><i>Yersinia pseudotuberculosis</i><br><i>Vibrio cholerae</i> | 16, 18, 34 |
| AAGG <sup>m6</sup> ATCTCAAGAAG <sup>m6</sup> ATCCTTTG <sup>m6</sup> ATCTTTTCTAC | 63.4    | GATC              | Numerous DNA adenine methylases |                                                                                                                                                                                                             |            |
| AAGCATGTCGAAGAACATGCTTTCATGTTTTCTAC                                             | 69.0    |                   | M.Tvol                          |                                                                                                                                                                                                             |            |
| AAGC <sup>m6</sup> ATGTCAAGAAC <sup>m6</sup> ATGCTTTC <sup>m6</sup> ATGTTTTCTAC | 65.4    | CATG              | M.ThaIV                         | <i>Thermoplasmata</i>                                                                                                                                                                                       | 16         |
| AAGGTACTCAAGAAGTACCTTTGTACTTTTCTAC                                              | 65.5    |                   |                                 |                                                                                                                                                                                                             |            |
| AAGGT <sup>m6</sup> ACTCAAGAAGT <sup>m6</sup> ACCTTTGT <sup>m6</sup> ACTTTTCTAC | 63.4    | GTAC              | M. HpyAXII                      | <i>Helicobacter pylori</i>                                                                                                                                                                                  | 35         |

**Table 2. oligos and melting temperature (Tm) of corresponding dsDNA used in this study.** Depicted are also the motifs recognized by prokaryotic methyltransferases (MTses), and examples of bacterial strains expressing the MTses.
